# Supplementary material for: Catalytic strategy for conversion of fructose to organic dyes, polymers, and liquid fuels
Source: Royal Society of Chemistry journal article supplement (doi:10.1039/d0gc01576h), 2020-01-01
Supplement: d0gc01576h1.pdf [file d0gc01576h1.pdf]

## Supplementary Material for

# Catalytic strategy for conversion of fructose to organic dyes, polymers, and liquid fuels

Hochan Chang<sup>a</sup>, Ishan Bajaj<sup>a</sup>, George W. Huber<sup>a</sup>, Christos T. Maravelias<sup>a,b</sup>, and James A. Dumesic<sup>\*a,b</sup>

<sup>a</sup> Department of Chemical and Biological Engineering, University of Wisconsin-Madison, Madison, WI 53706, USA.

<sup>b</sup> DOE Great Lakes Bioenergy Research Center, University of Wisconsin-Madison, 1552 University Ave, Madison, WI 53726, USA .

\* Corresponding author: James A. Dumesic ([jdumesic@wisc.edu](mailto:jdumesic@wisc.edu))

## Tables and Figures

**Table S1.** Analysis of major products (HMF, HA, formic acid) from fructose dehydration after distillation of dehydrated and decolorized solution (Dehydration conditions: 9.1 wt% fructose in acetone/water (75/25, v/v) solvent with 124 mM HCl at 393 K, 40 min; Decolorization conditions: 4.1 wt% activated carbon addition at 298 K, 30 min; Distillation conditions: 50 mbar, 298 K)

|             | Collected chemical fraction<br>in top product (%) | Collected chemical fraction<br>in bottom product (%) | Chemical formation (+) &<br>degradation (-) after<br>distillation (%) |
|-------------|---------------------------------------------------|------------------------------------------------------|-----------------------------------------------------------------------|
| HMF         | 0.4                                               | 90                                                   | -9.6                                                                  |
| HA          | 0                                                 | 87                                                   | -13                                                                   |
| Formic acid | 9                                                 | 105                                                  | +14                                                                   |

**Table S2.** Mass and energy balances (basis: 10000 kg·h<sup>-1</sup> of fructose feedstock) based on process block-flow diagram in Fig. 6.

| Process section | Stream<br>number | Mass flow<br>(tonne/h) | Pressure<br>(bar) | Temp<br>(°C) | Energy requirement (MW)                                    |
|-----------------|------------------|------------------------|-------------------|--------------|------------------------------------------------------------|
| HMF production  | 1                | 10                     | 1                 | 25           | Electricity: 0.04<br>Heating: 10.37<br>Cooling water: 0.07 |
|                 | 2                | 1.1                    | 1                 | 25           |                                                            |
|                 | 3                | 0.3                    | 1                 | 25           |                                                            |
|                 | 4                | 5.8                    | 1                 | 25           |                                                            |
|                 | 5                | 103.7                  | 10                | 120          |                                                            |
|                 | 6                | 86.5                   | 0.035             | 20           |                                                            |

|                  |    |       |       |      |                                                                              |
|------------------|----|-------|-------|------|------------------------------------------------------------------------------|
| Solvent recovery | 7  | 0.9   | 1     | 51.3 | Electricity: $4.53 \times 10^{-3}$<br>Heating: 11.11<br>Refrigeration: 21.84 |
|                  | 8  | 21.6  | 1     | 25   |                                                                              |
|                  | 9  | 37.9  | 0.035 | 20   |                                                                              |
| HAH production   | 10 | 33.4  | 1     | 25   | Electricity: $1.16 \times 10^{-3}$<br>Heating: 0.94<br>Cooling water: 2.38   |
|                  | 11 | 0.3   | 1     | 25   |                                                                              |
|                  | 12 | 0.9   | 1     | 25   |                                                                              |
|                  | 13 | 72.5  | 1     | 35   |                                                                              |
| HAH purification | 14 | 284.2 | 1     | 27.4 | Heating: 1.38                                                                |
|                  | 15 | 216.4 | 1     | 25   |                                                                              |
|                  | 16 | 0.6   | 1     | 25   |                                                                              |
|                  | 17 | 5.3   | 1     | 27.4 |                                                                              |

**Table S3.** Energy requirements before and after heat integration.

| Energy required (MW) | Before | After |
|----------------------|--------|-------|
| Heating              | 30     | 23.8  |
| Cooling              | 30.5   | 24.3  |

**Table S4.** Summary of estimated capital costs of the proposed approach.

| Process section  | Capital cost (MM\$) | Equipment     | Installed equipment cost (\$) | Reference  |
|------------------|---------------------|---------------|-------------------------------|------------|
| HMF production   | 1.1                 | R-1           | 630,782                       | (2)        |
|                  |                     | Miscellaneous | 425,198                       | Aspen Plus |
| Solvent recovery | 4.4                 | S-1           | 184,490                       | Aspen Plus |
|                  |                     | S-2           | 580,006                       | (2)        |
|                  |                     | S-3           | 499,059                       | Aspen Plus |
|                  |                     | E-1           | 175,563                       | Aspen Plus |
|                  |                     | E-2           | 2,793,495                     | Aspen Plus |
|                  |                     | Miscellaneous | 150,695                       | Aspen Plus |
|                  |                     |               |                               |            |
| HAH production   | 0.4                 | R-2           | 338,300                       | (2)        |
|                  |                     | Miscellaneous | 104,360                       | Aspen Plus |
| HAH purification | 3.8                 | S-4           | 2,927,143                     | (2)        |
|                  |                     | S-5           | 829,628                       | (2)        |
| OSBL*            | 3.9                 | -             | -                             | -          |

|                          |      |   |   |   |
|--------------------------|------|---|---|---|
| Total installed cost     | 13.6 | - | - | - |
| Total capital investment | 30.3 | - | - | - |

\*OSBL (outside battery limits of the plant) consists of infrastructure costs for on-site storage, utilities, and on-site storage. It is taken to be 40% of the inside battery limits (ISBL) equipment costs.

**Table S5.** Summary of operating costs.

| Raw material                   | Total cost (MM\$/year) |
|--------------------------------|------------------------|
| Fructose                       | 56.46                  |
| Acetone                        | 12.23                  |
| HCl                            | 3.25                   |
| Water                          | 0.98                   |
| NaOH                           | 6.48                   |
| Steam                          | 1.28                   |
| Cooling water                  | 0.01                   |
| Refrigerant                    | 1.7                    |
| Electricity                    | 0.02                   |
| Wastewater treatment           | 1.55                   |
| Total variable operating costs | 84.27                  |
| Total fixed operating costs    | 1.79                   |

**Table S6.** Economic parameters and assumptions.

|                                                 |          |
|-------------------------------------------------|----------|
| Fructose price (\$/ton) <sup>a</sup>            | 650      |
| Acetone price (\$/ton) <sup>b</sup>             | 950      |
| 33% HCL price (\$/ton) <sup>b</sup>             | 150      |
| NaOH price (\$/ton) <sup>b</sup>                | 850      |
| Water (\$/ton) <sup>c</sup>                     | 0.4      |
| Low pressure steam (\$/kJ) <sup>d</sup>         | 1.89e-06 |
| Activated carbon (\$/kg) <sup>e</sup>           | 1.48     |
| Cooling water (\$/kJ) <sup>d</sup>              | 2.12e-07 |
| -25° C Refrigerant (\$/kJ) <sup>d</sup>         | 2.73e-06 |
| Electricity price (\$/kWh) <sup>f</sup>         | 0.0693   |
| Wastewater treatment cost (\$/ton) <sup>g</sup> | 0.57     |
| Ash disposal (\$/ton)                           | 37.93    |
| Plant operating hours per year <sup>c</sup>     | 7880     |

|                                                           |                        |
|-----------------------------------------------------------|------------------------|
| Plant life (year) <sup>c</sup>                            | 30                     |
| Internal rate of return (%) <sup>c</sup>                  | 10                     |
| Plant depreciation (year) <sup>c</sup>                    | 7                      |
| Loan terms <sup>c</sup>                                   | 10-year loan at 8% APR |
| Construction time (year) <sup>c</sup>                     | 3                      |
| First 12 months' expenditure <sup>c</sup>                 | 8                      |
| Next 12 months' expenditure <sup>c</sup>                  | 60                     |
| Last 12 months' expenditure <sup>c</sup>                  | 32                     |
| Federal tax rate (%) <sup>c</sup>                         | 21                     |
| Financing (% of equity) <sup>c</sup>                      | 40                     |
| Start-up time (month) <sup>c</sup>                        | 6                      |
| Revenue during start-up (%) <sup>c</sup>                  | 50                     |
| Variable operating costs during start-up (%) <sup>c</sup> | 75                     |
| Fixed operating costs during start-up (%) <sup>c</sup>    | 100                    |

<sup>a</sup> Taken from Motagamwala et al. (3).

<sup>b</sup> Taken from ICIS news (4–6).

<sup>c</sup> Taken from Davis et al. (2).

<sup>d</sup> Estimated based on Aspen Process Economic Analyzer (V10 Aspen Technology).

<sup>e</sup> Taken from a report by USGS (7).

<sup>f</sup> Taken from EIA (8).

<sup>g</sup> Taken from a report by IWW (9).

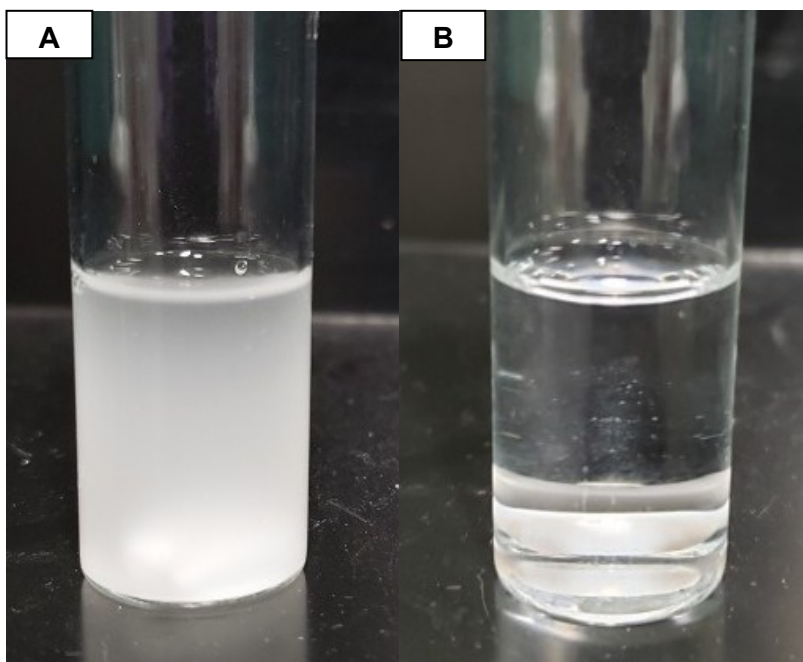

**Fig. S1.** (A) 8.5 wt% fructose (emulsion phase), (B) 8.3 wt% fructose (homogeneous phase) in acetone/water (80/20, v/v) solvent at 298 K.

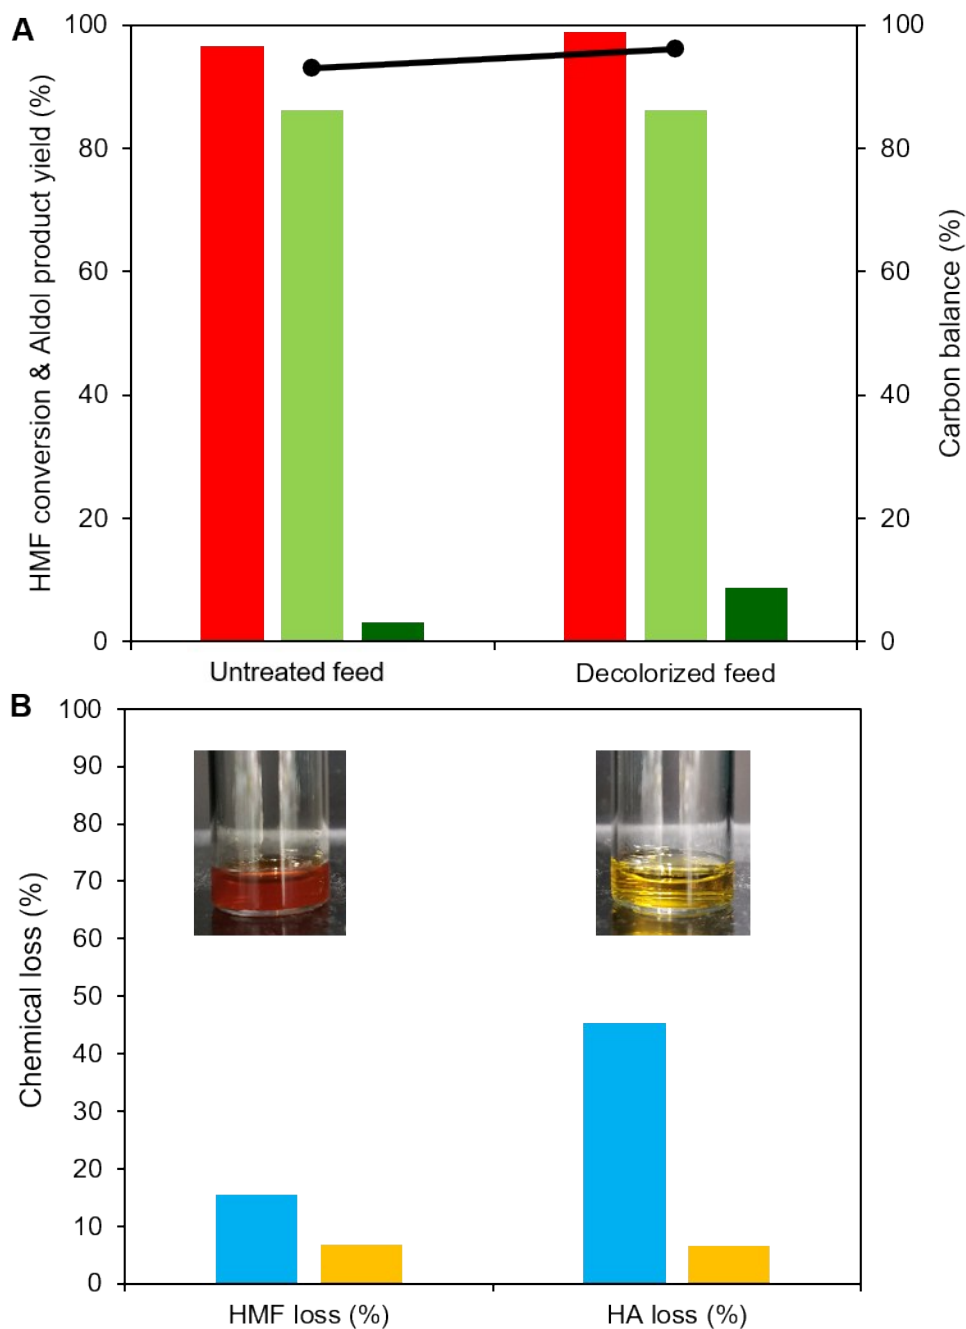

**Fig.S2. (A)** HMF conversion (Red bar) and aldol product yield (HAH: Light green bar, HA: Dark green bar), and carbon balance (Black dot) of 'Untreated feed' and 'Decolorized feed' for aldol condensation of *HMF*

fructose-derived HMF and acetone (Reaction conditions:  $\frac{\text{Acetone} + \text{HA}}{\text{HMF}}$  (mol) = 2.6, 0.17 M NaOH, at

308K, 50 min for decolorized feed;  $\frac{\text{Acetone} + \text{HA}}{\text{HMF}}$  (mol) = 2.5, 0.21 M NaOH, at 308 K, 60 min for pure feed), **(B)** Chemical loss after distillation with decolorization (Light blue bar) and after distillation without decolorization (Yellow bar). Inset images represent the color of HMF solution before (left) and after (right) the decolorization.

**A**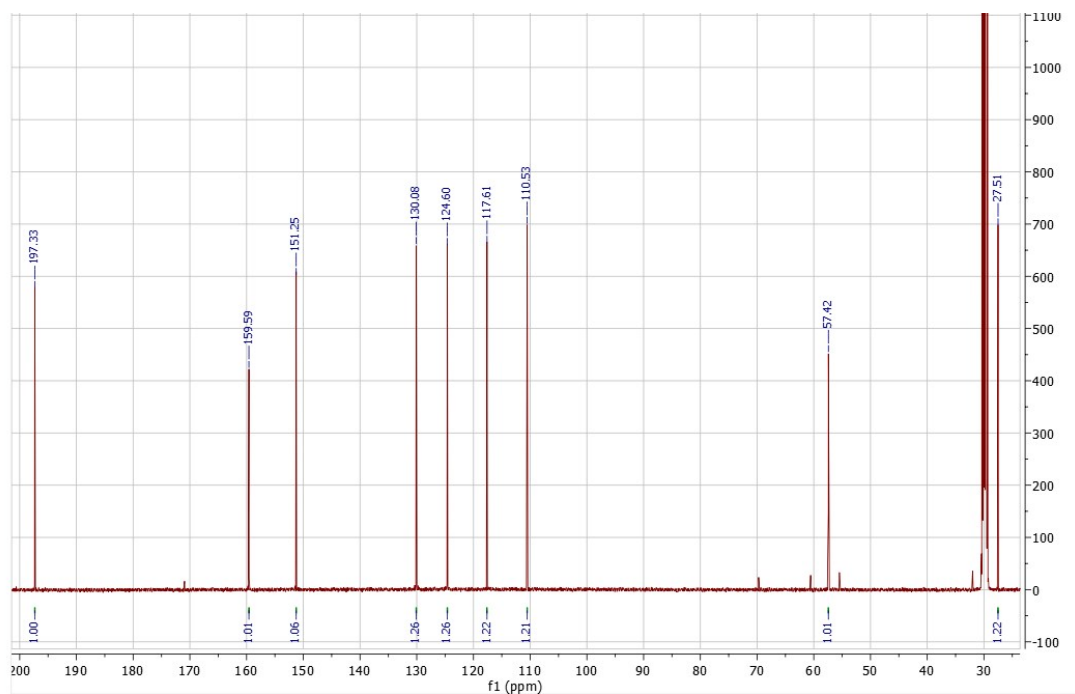**B**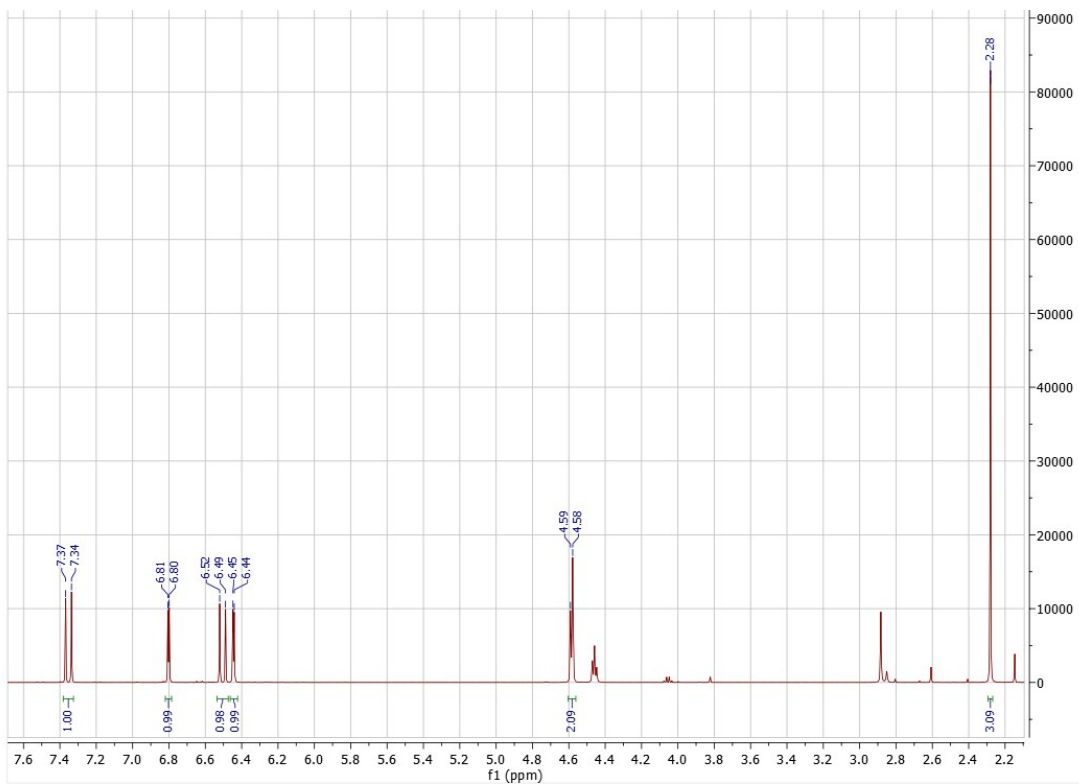

**Fig.S3.** (A)  $^{13}\text{C}$  quantitative NMR spectrum of HA (126 MHz, Acetone)  $\delta$ : 197.33 (1C), 159.59 (1C), 151.25 (1C), 130.08 (1C), 124.60 (1C), 117.61 (1C), 110.53 (1C), 57.42 (1C), 27.51 (1C) ppm. (B)  $^1\text{H}$  standard NMR spectrum of HA (500 MHz, Acetone)  $\delta$ : 7.37-7.34 (1H), 6.81-6.80 (1H), 6.52-6.49 (1H), 6.45-6.44 (1H), 4.59-4.58 (2H), 2.28 (3H) ppm.

**A**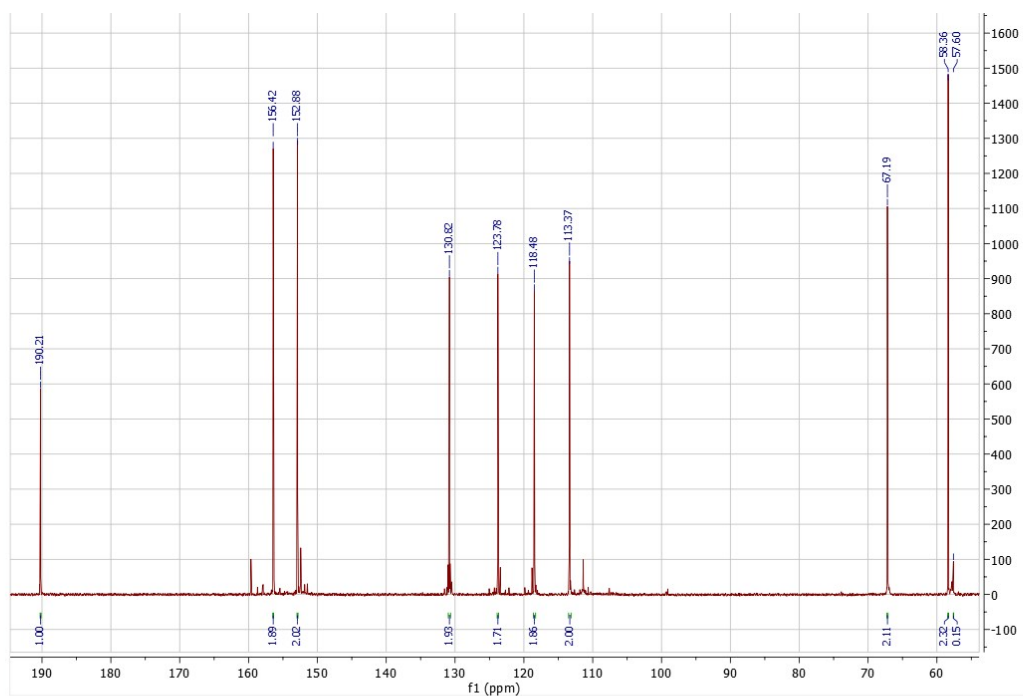**B**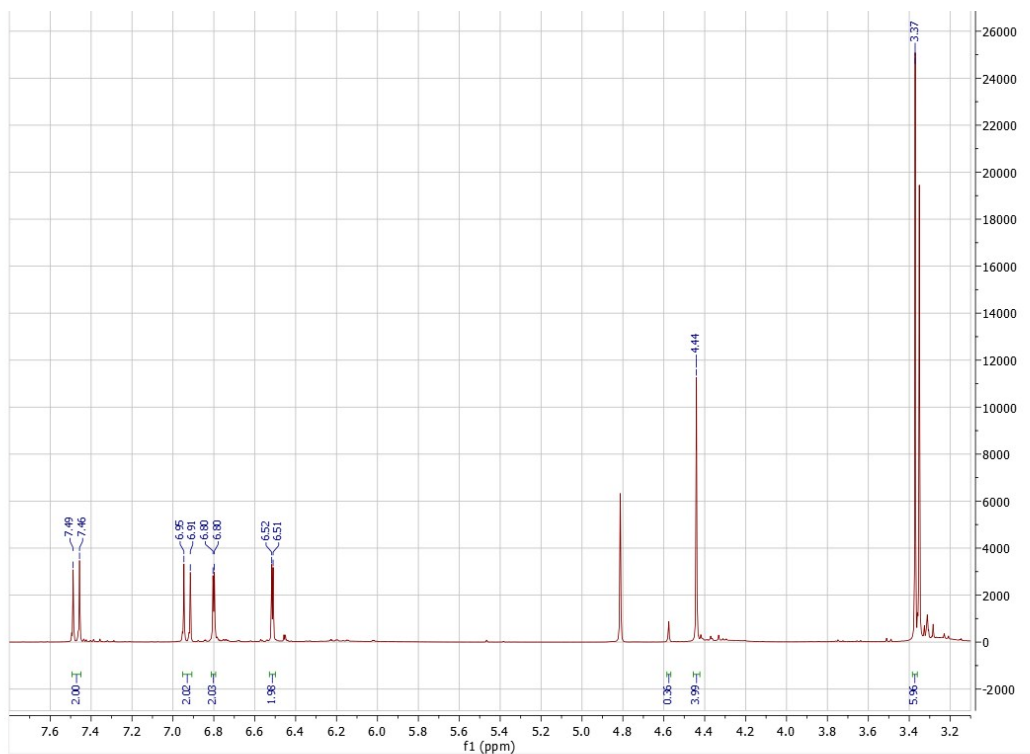

**Fig.S4. (A)**  $^{13}\text{C}$  quantitative NMR spectrum of etherified HAH (126 MHz, MeOD)  $\delta$ : 190.21 (1C), 156.42 (2C), 152.88 (2C), 130.82 (2C), 123.78 (2C), 118.48 (2C), 113.37 (2C), 67.19 (2C), 58.36 (2C) ppm. **(B)**  $^1\text{H}$  standard NMR spectrum of etherified HAH (500 MHz, MeOD)  $\delta$ : 7.49-7.46 (m,2H), 6.95-6.91 (m,2H), 6.80 (d,2H), 6.52 (d,2H), 4.44 (s,4H), 3.37 (s,6H) ppm.  $\text{C}_{17}\text{H}_{18}\text{O}_5$   $[\text{M}+\text{H}]^+$  calculated: 303.1227, measured: 303.1224 (Error: 1.0 ppm).



**A**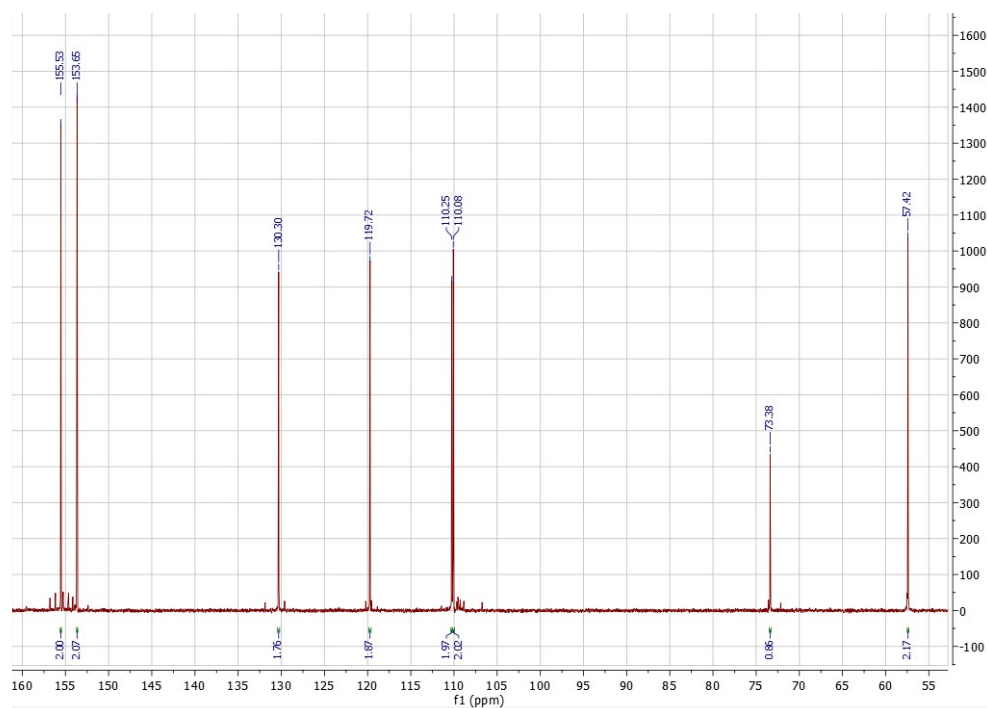**B**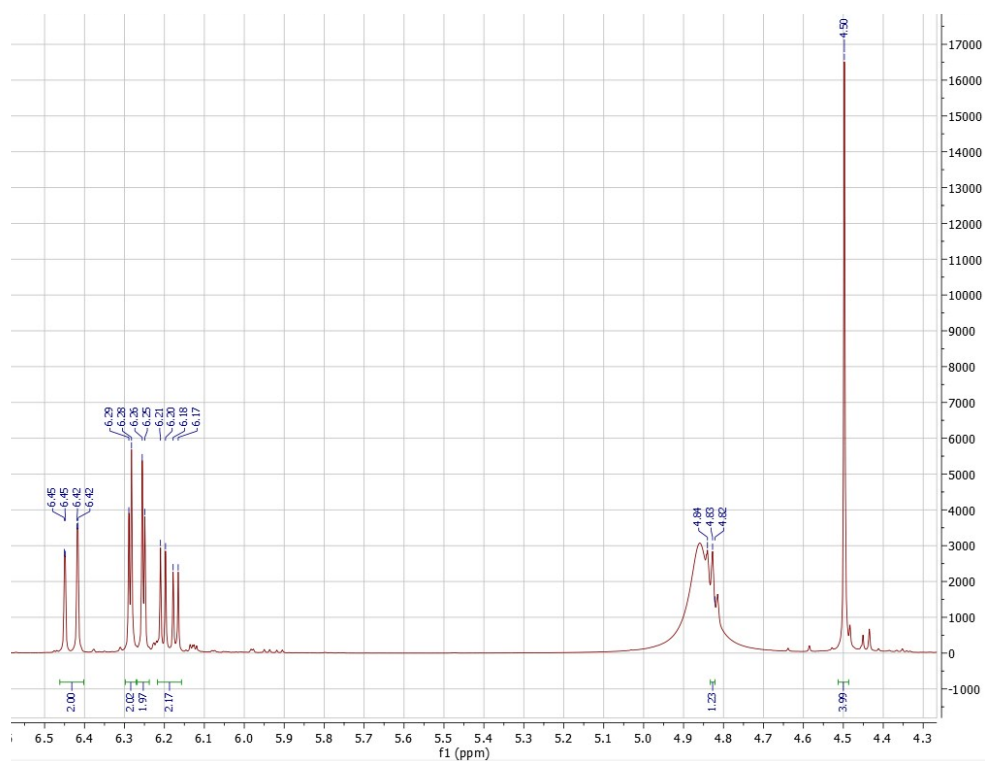

**Fig.S5. (A)** <sup>13</sup>C quantitative NMR spectrum of selectively reduced HAH (126 MHz, MeOD)  $\delta$ : 155.53 (2C), 153.65 (2C), 130.30 (2C), 119.72 (2C), 110.25 (2C), 110.08 (2C), 73.38 (1C), 57.42 (2C) ppm. **(B)** <sup>1</sup>H standard NMR spectrum of selectively reduced HAH (500 MHz, MeOD)  $\delta$ : 6.45 (d,1H), 6.42 (d,1H), 6.29 (d,2H), 6.26

(d,2H), 6.21 (d,1H), 6.18 (d,1H), 4.83 (t,1H), 4.50 (s,4H) ppm.  $C_{15}H_{16}O_5$   $[M+Na]^+$  calculated: 299.0890, measured: 299.0889 (Error: 0.3 ppm).

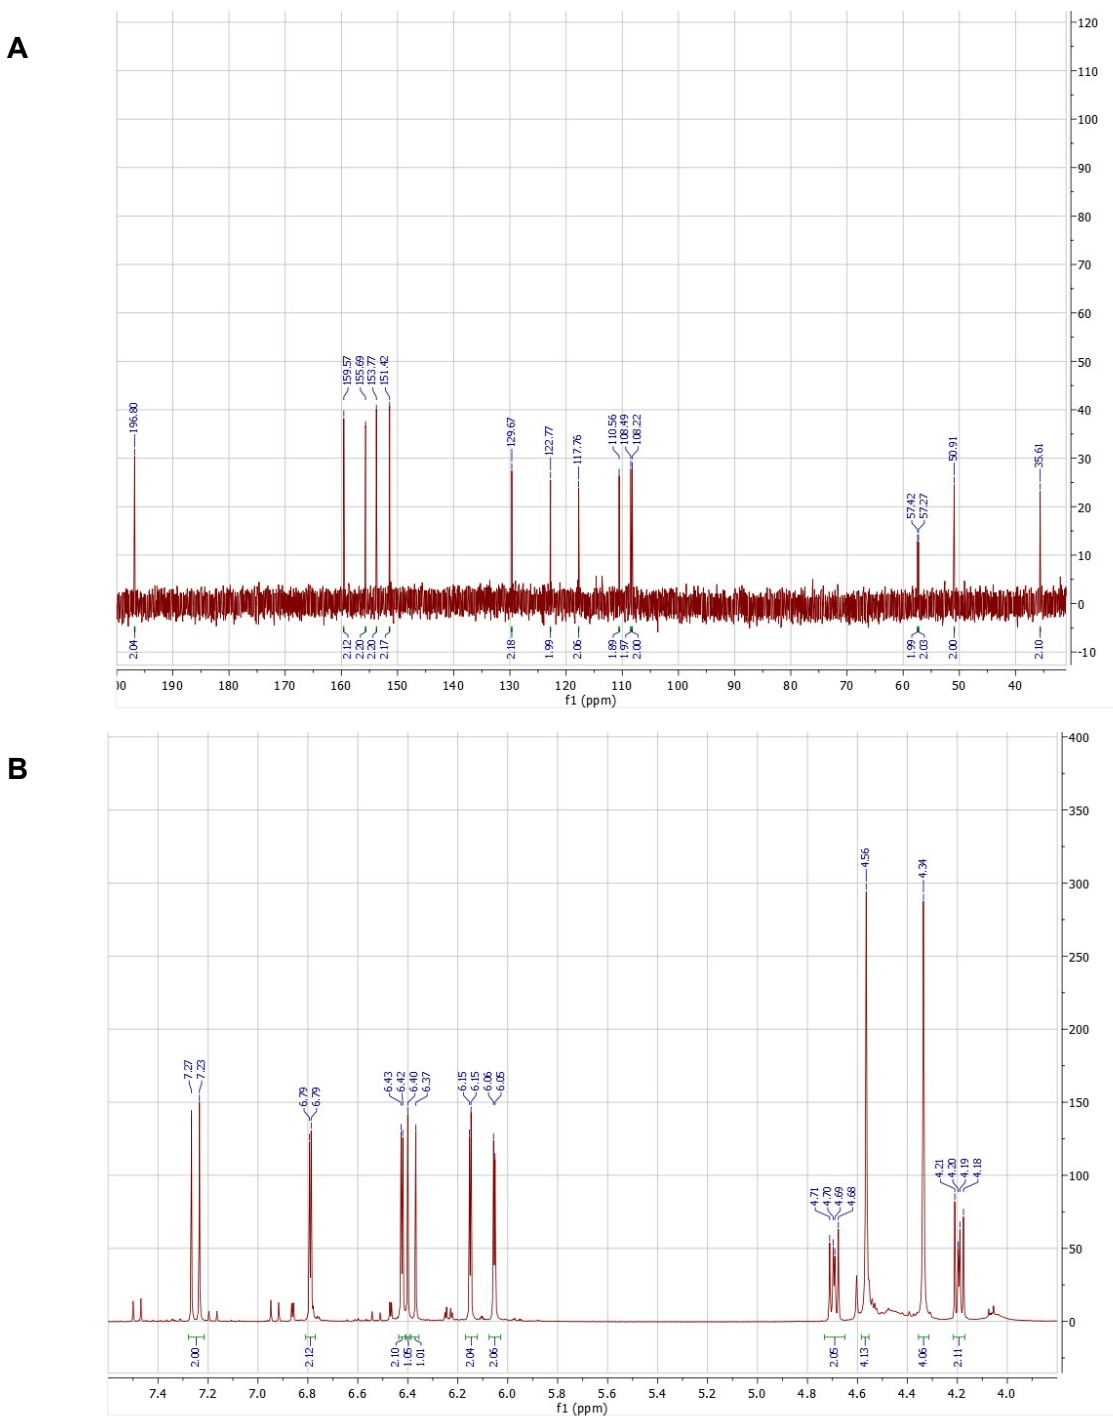

**Fig.S6. (A)**  $^{13}C$  quantitative NMR spectrum of selectively reduced HAH (126 MHz, Acetone- $d_6$ )  $\delta$ : 196.80 (2C), 159.57 (2C), 155.69 (2C), 153.77 (2C), 151.42 (2C), 129.67 (2C), 122.77 (2C), 117.76 (2C), 110.56 (2C), 108.49 (2C), 108.22 (2C), 57.42 (2C), 57.27 (2C), 50.91 (2C), 35.61 (2C) ppm. **(B)**  $^1H$  standard NMR spectrum

of selectively reduced HAH (500 MHz, Acetone- $d_6$ )  $\delta$ : 7.27-7.23 (2H), 6.79 (d, 2H), 6.43 (d, 2H), 6.40 (s, 1H), 6.37 (s, 1H), 6.15 (d, 2H), 6.05 (d, 2H), 4.70 (dd, 2H), 4.56 (s, 4H), 4.34 (s, 4H), 4.20 (dd, 2H) ppm.  $C_{30}H_{28}O_{10}$   $[M+Na]^+$  calculated: 571.1575, measured: 571.1567 (Error: 1.4 ppm).

**A**

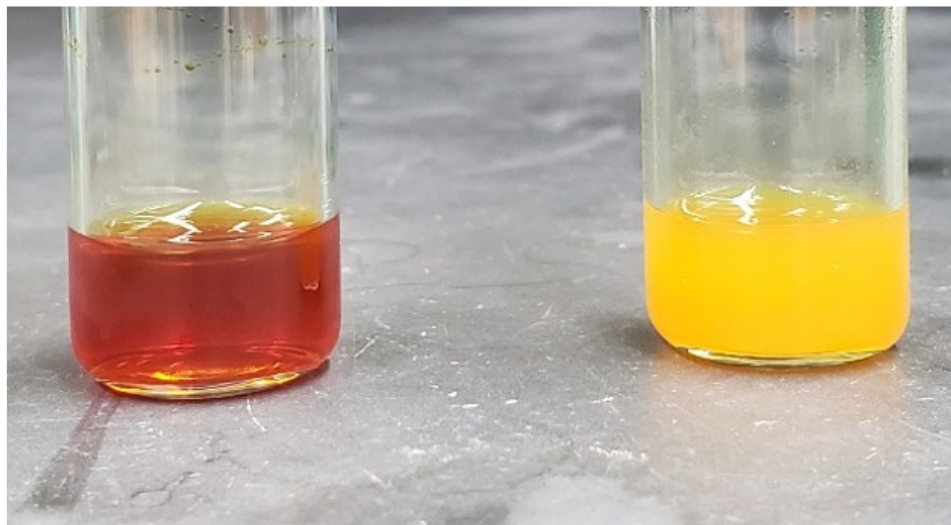

**B**

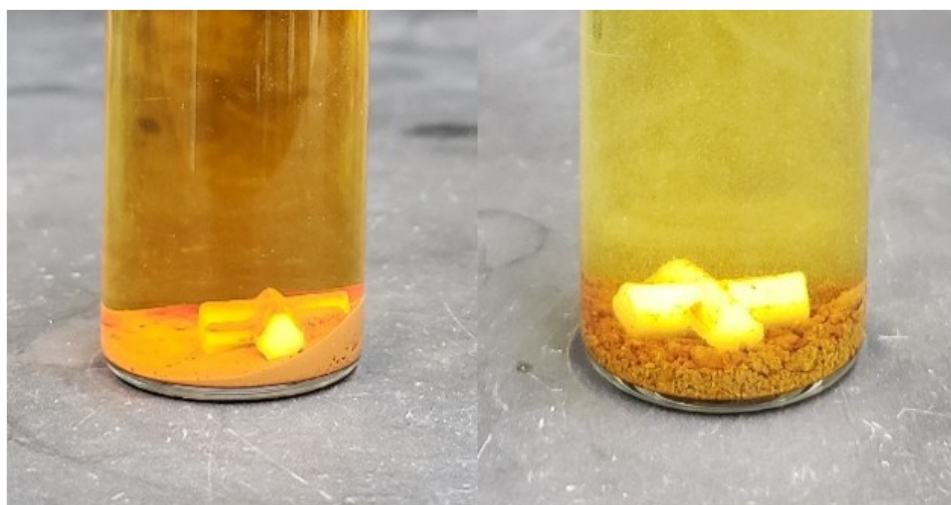

**C**

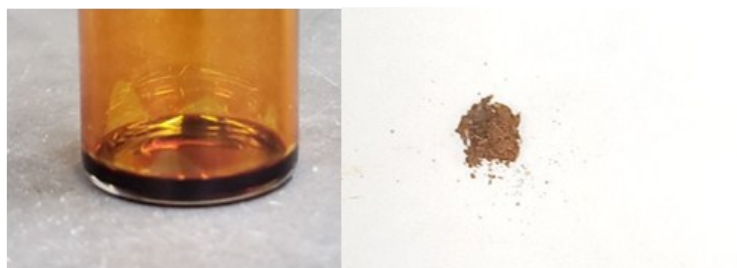

**Fig.S7.** (A) The color of the solution before (right) and after (left) the etherification, (B) The color of the solution before (right) and after (left) the dimerization, (C) Dried samples of etherified HAH, HAH dimer, and HAH at room temperature (from left to right, etherified HAH, HAH dimer, and HAH, respectively).

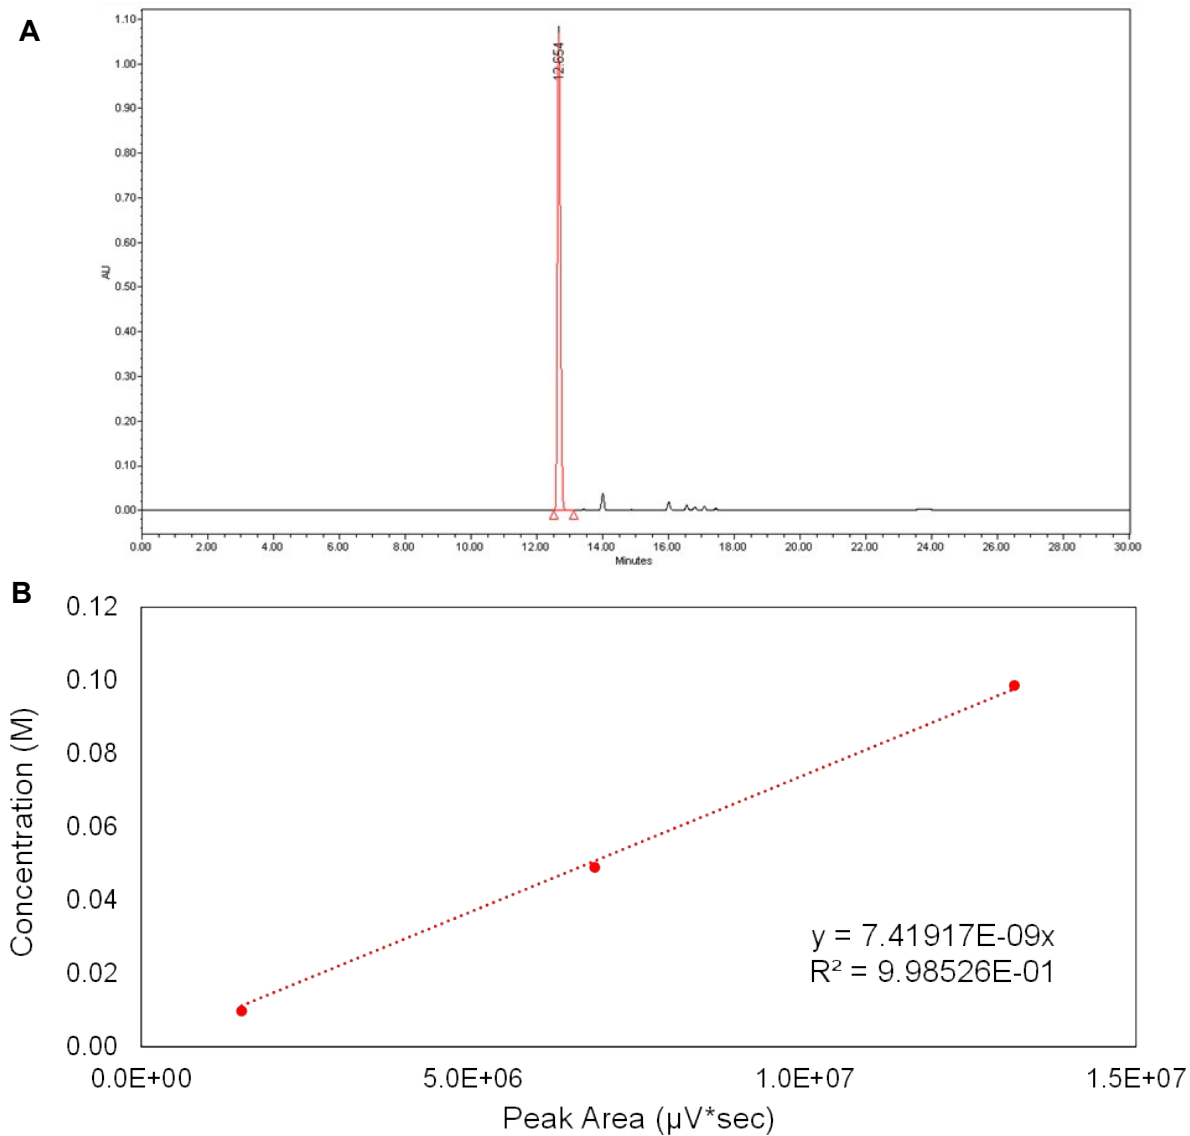

**Fig.S8. (A)** Retention time (12.654 min) of 0.05 M purified HA in methanol solvent by HPLC analysis (UV wavelength of detector: 390 nm), **(B)** HPLC calibration curve for HA qualification.

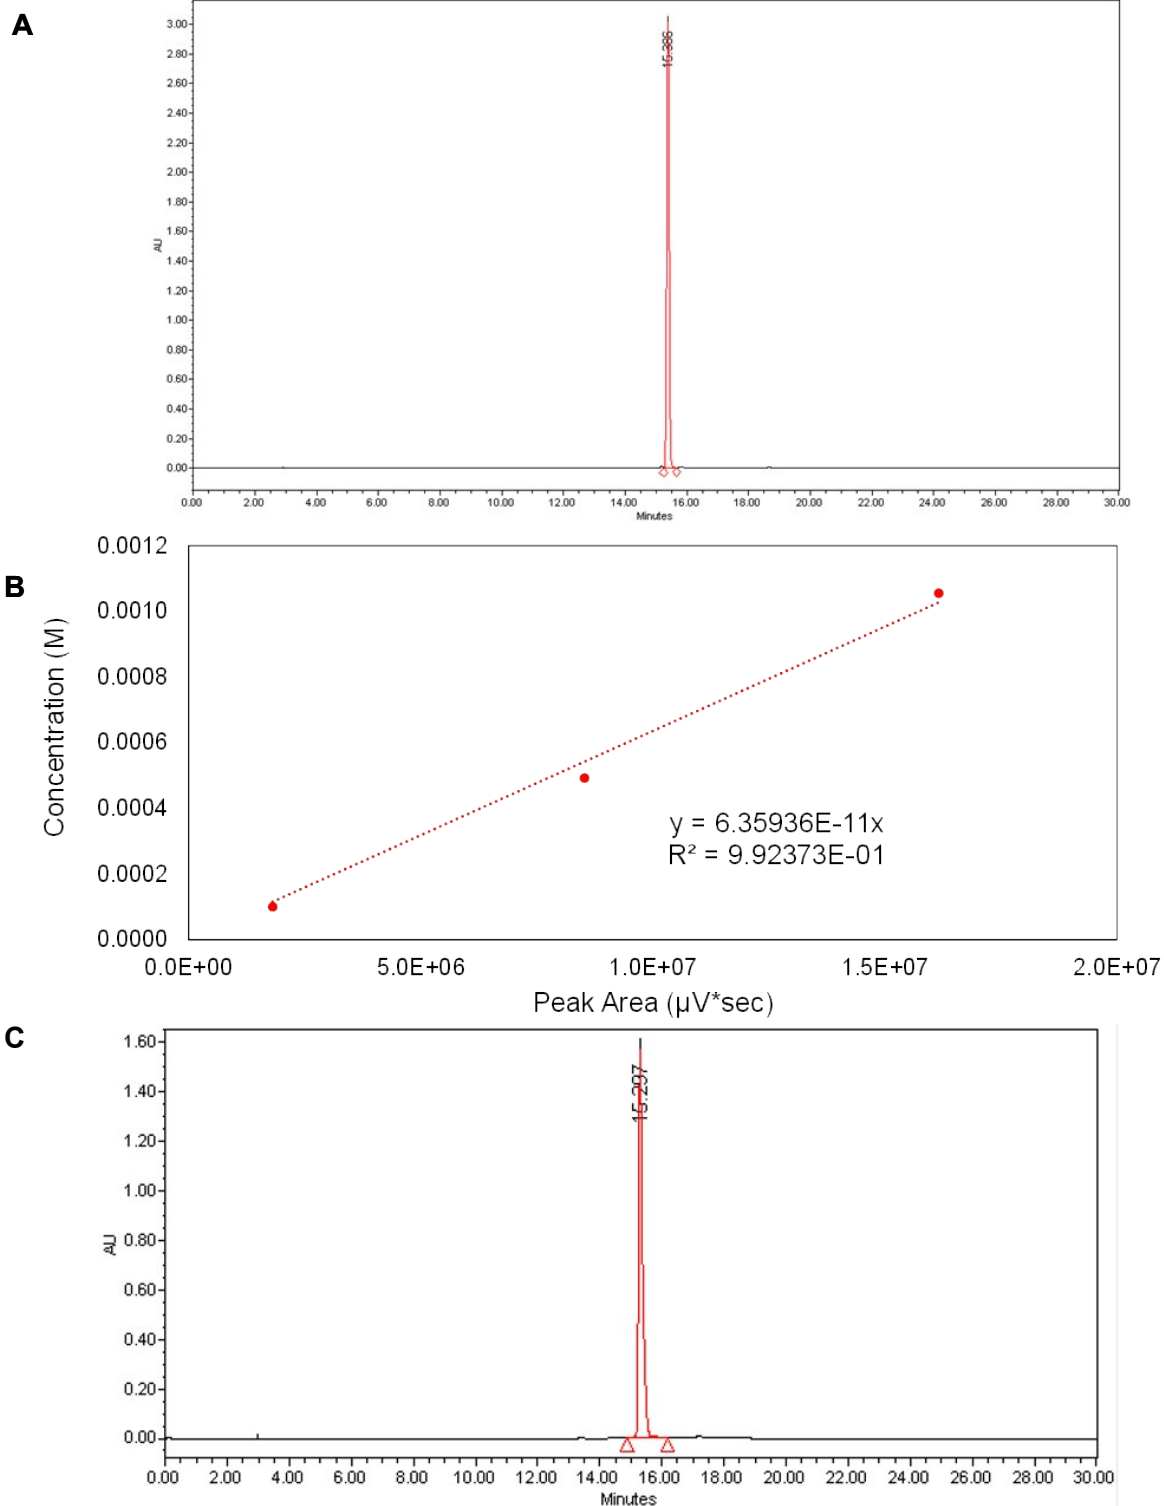

**Fig. S9.** (A) Retention time (15.386 min) of 0.001 M purified HAH in methanol solvent by HPLC analysis (UV wavelength of detector: 390 nm), (B) HPLC calibration curve for HAH qualification, (C) Purity analysis of 0.001 M fructose-derived HAH in methanol solvent (UV wavelength of detector: 390 nm).

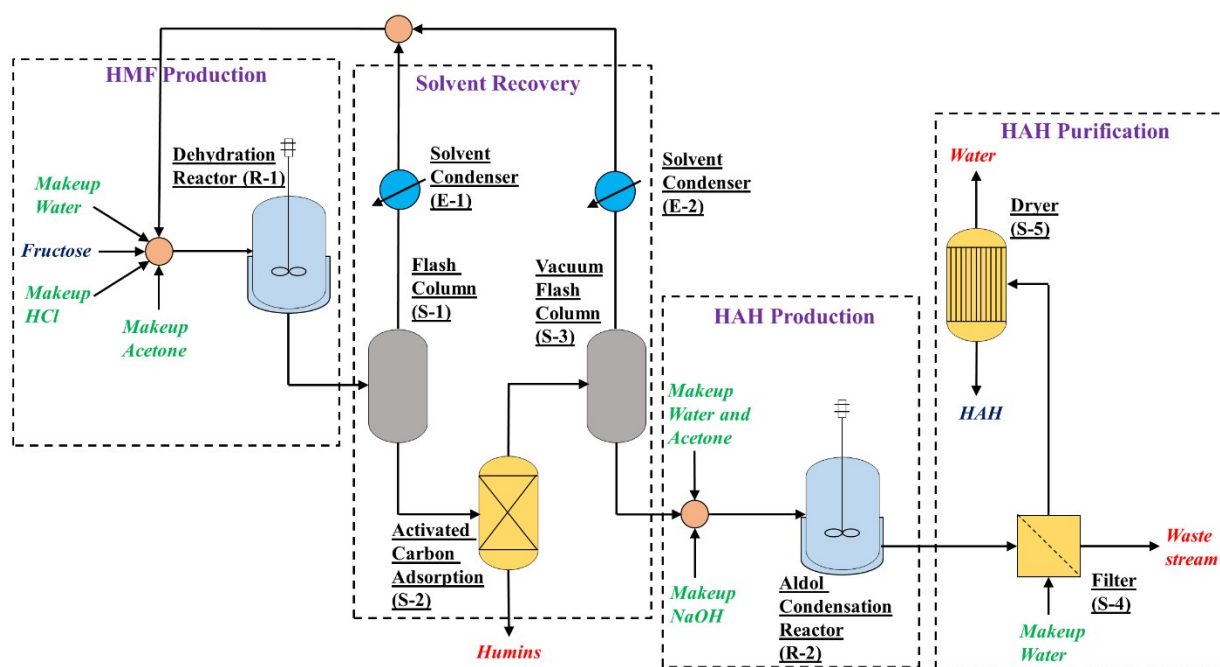

**Fig. S10.** Overview of the process flow diagram.

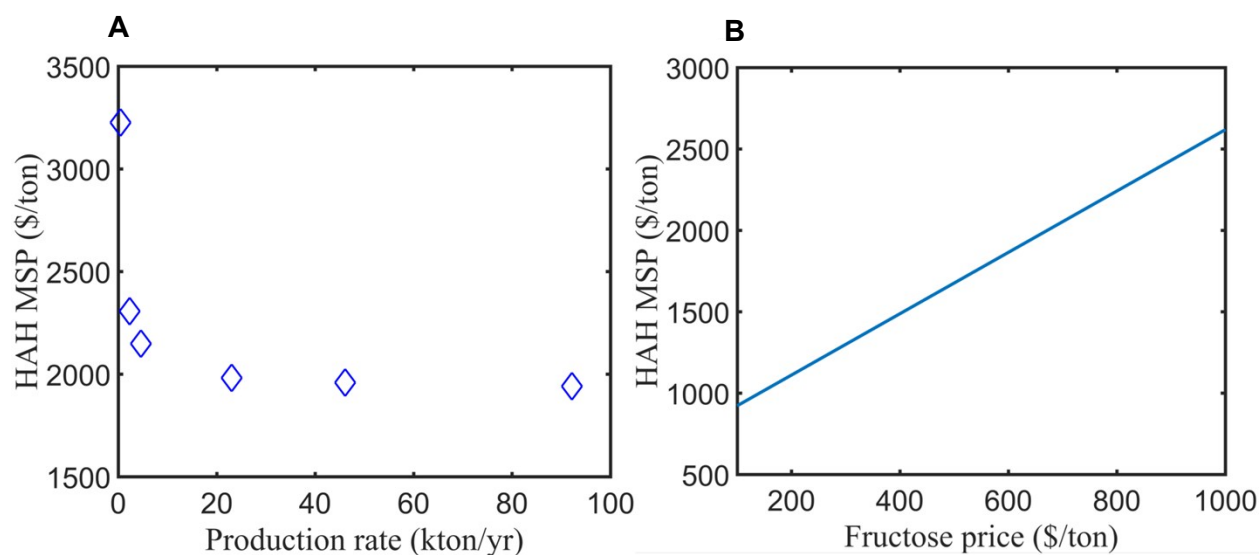

**Fig. S11.** Illustration of variation of HAH minimum selling price (MSP) as a function of (A) production rate of HAH and (B) fructose price. The annual production of high fructose corn syrup is 8.1 million tons (10), which suggests that orders of magnitude more fructose is available to meet the production capacity considered in Fig. (A).

## References

1. H. Chang, A. H. Motagamwala, G. W. Huber, J. A. Dumesic, Synthesis of biomass-derived feedstocks for the polymers and fuels industries from 5-(hydroxymethyl)furfural (HMF) and acetone. *Green Chem.* (2019), doi:10.1039/C9GC01859J.
2. R. Davis, N. Grundl, L. Tao, M. J. Bidy, E. C. D. Tan, G. T. Beckham, D. Humbird, D. N. Thompson, M. S. Roni, Process Design and Economics for the Conversion of Lignocellulosic Biomass to Hydrocarbon Fuels and Coproducts: 2018 Biochemical Design Case Update: Biochemical Deconstruction and Conversion of Biomass to Fuels and Products via Integrated Biorefinery Path. *Tech. Rep. NREL/TP-5100-71949* (2018).
3. A. H. Motagamwala, W. Won, C. Sener, D. M. Alonso, C. T. Maravelias, J. A. Dumesic, Toward biomass-derived renewable plastics: Production of 2,5-furandicarboxylic acid from fructose. *Sci. Adv.* **4**, eaap9722 (2018).
4. ICIS News, US acetone challenges persist on length, but costs fall, <https://www.icis.com/explore/resources/news/2018/12/28/10299936/outlook-19-us-acetone-challenges-persist-on-length-but-costs-fall/> (2018).
5. ICIS News, US HCl market expects stronger demand, firming prices, <https://www.icis.com/explore/resources/news/2019/01/03/10300671/outlook-19-us-hcl-market-expects-stronger-demand-firming-prices/> (2019).
6. ICIS News, US caustic soda sales to Australia will lower in 2019, <https://www.icis.com/explore/resources/news/2019/01/09/10304504/us-caustic-soda-sales-to-australia-will-lower-in-2019/> (2019).
7. USGS, Mineral Commodity Summaries (2019).
8. EIA - Electricity Data, [https://www.eia.gov/electricity/monthly/epm\\_table\\_grapher.php?t=epmt\\_5\\_03](https://www.eia.gov/electricity/monthly/epm_table_grapher.php?t=epmt_5_03).
9. IWW, Industrial WaterWorld Survey Examines Wastewater Treatment Costs, <https://www.waterworld.com/home/article/16210601/survey-examines-wastewater-treatment-costs> (2011).
10. USDA ERS, Table 30-U.S. high fructose corn syrup (HFCS) supply and use, by calendar year, <https://www.ers.usda.gov/data-products/sugar-and-sweeteners-yearbook-tables.aspx> (2019).
